# Supplementary material for: Angelica Stem: A Potential Low-Cost Source of Bioactive Phthalides and Phytosterols
Source: PubMed Central journal article supplement (PMC6321507; doi:10.3390/molecules23123065), 2018-11-23
Supplement: molecules-23-03065-s001.pdf [file molecules-23-03065-s001.pdf]

# Angelica Stem: A Potential Low-cost Source of Bioactive Phthalides and Phytosterols

Chengke Zhao <sup>1</sup>, Yuan Jia <sup>1</sup> and Fachuang Lu <sup>1, 2,\*</sup>

<sup>1</sup> State Key Laboratory of Pulp and Paper Engineering, South China University of Technology, Guangzhou, 510640, China; mszck@foxmail.com (C. Zhao); 201620121278@mail.scut.edu.cn (Y. Jia); fefclv@scut.edu.cn (F. Lu)

<sup>2</sup> Guangdong Engineering Research Center for Green Fine Chemicals, Guangzhou 510640, China

\* Correspondence: fefclv@scut.edu.cn (F. Lu); Tel.: +86-020-8711-3953

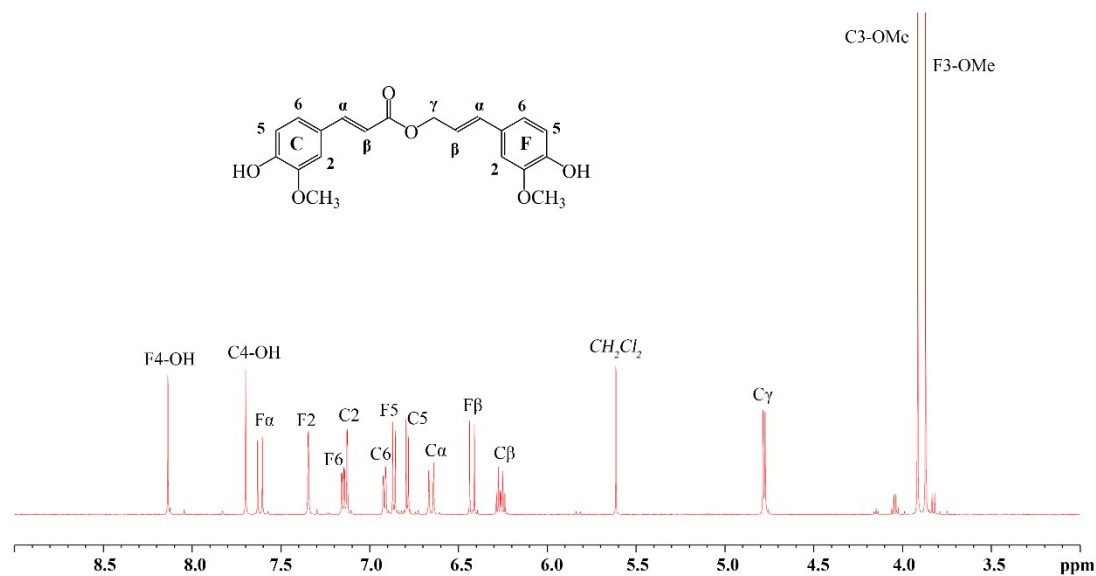

**Figure S1.**  $^1\text{H}$  NMR of coniferyl ferulate.

**Table S1.** GC-MS program for analyzing derivatized extracts of angelica sinensis.

|                   |                                                                                                                                                        |
|-------------------|--------------------------------------------------------------------------------------------------------------------------------------------------------|
| Gas Chromatograph | GC-2010 Plus                                                                                                                                           |
| Inlet             | 200 °C<br>Split liner with glass wool (Shimadzu 220-90784-00)<br>Split injection (20:1)                                                                |
| Column            | SH-Rxi-5Sil MS 30 m x 0.25 mm x 0.25 $\mu\text{m}$ (Restek 13623)<br>Helium carrier gas<br>Constant linear velocity 47.2 cm/sec                        |
| Oven Program      | 50 °C, ramp 8 °C/minute to 150 °C, 5 °C/minute to 230 °C, 10°C/minute to 280 °C,<br>hold 20 minutes<br>MS interface 280 °C<br>Analysis time 55 minutes |
| Mass Spectrometer | GCMS-TQ8040                                                                                                                                            |
| Ion Source        | 200 °C<br>Electron ionization (EI) mode, 70 eV                                                                                                         |
| Operation Mode    | Q3 scan                                                                                                                                                |
| Detector          | Electron multiplier 1.6 kV                                                                                                                             |

**Table S2.** LC-MS/MS program for analysis of coniferyl ferulate and ferulic acid.

|                        |                                                                                                                                                                                                 |              |      |              |      |              |      |
|------------------------|-------------------------------------------------------------------------------------------------------------------------------------------------------------------------------------------------|--------------|------|--------------|------|--------------|------|
| LC Chromatograph       | Nexera UHPLC system                                                                                                                                                                             |              |      |              |      |              |      |
| Injector               | SIL-20AXR<br>Inject 1 $\mu$ L                                                                                                                                                                   |              |      |              |      |              |      |
| Pump                   | Binary high-pressure gradient system<br>Mobile phase: Acetonitrile-aqueous (with 0.1% acetic acid)<br>Total flow rate 0.4 mL/min                                                                |              |      |              |      |              |      |
| Time program           | 0-2 min 5% acetonitrile; 2-6 min linear gradient to 40% acetonitrile; 6-10 min linear gradient to 80% acetonitrile; 10-15 min isocratic elution 80% acetonitrile; 15.1 -18 min 5% acetonitrile. |              |      |              |      |              |      |
| Column                 | Shim-pack GISS C18 Column SH-Rxi-5Sil MS 50 mm x 2.1 mm x 1.9 $\mu$ m                                                                                                                           |              |      |              |      |              |      |
| Oven Program           | CTO-20AC, 30 $^{\circ}$ C                                                                                                                                                                       |              |      |              |      |              |      |
| Mass Spectrometer      | LCMS-TQ8050                                                                                                                                                                                     |              |      |              |      |              |      |
| Interface              | Electronic Spray Ion (ESI) mode<br>Gas1 3 L/min; drying gas 10 L/min<br>Interface 200 $^{\circ}$ C; DL250 $^{\circ}$ C; Heating block 300 $^{\circ}$ C                                          |              |      |              |      |              |      |
| Operation Mode         | Multiple Reaction Monitoring (MRM), negative ion mode<br>Argon gas, 17 kPa<br>Ion range 80-500 (m/z)<br>Event time 0.309 s; total measure time 15 min                                           |              |      |              |      |              |      |
| MRM Transition Details |                                                                                                                                                                                                 |              |      |              |      |              |      |
| Compound Name          | Retention time (min)                                                                                                                                                                            | Transition 1 | CE 1 | Transition 2 | CE 2 | Transition 3 | CE 3 |
| Ferulic acid           | 5.12                                                                                                                                                                                            | 193>178.2    | 14   | 193>134.1    | 14   | 193>133.1    | 25   |
| Coniferyl ferulate     | 8.04                                                                                                                                                                                            | 193>178.2    | 14   | 193>134.1    | 14   | 193>133.1    | 25   |

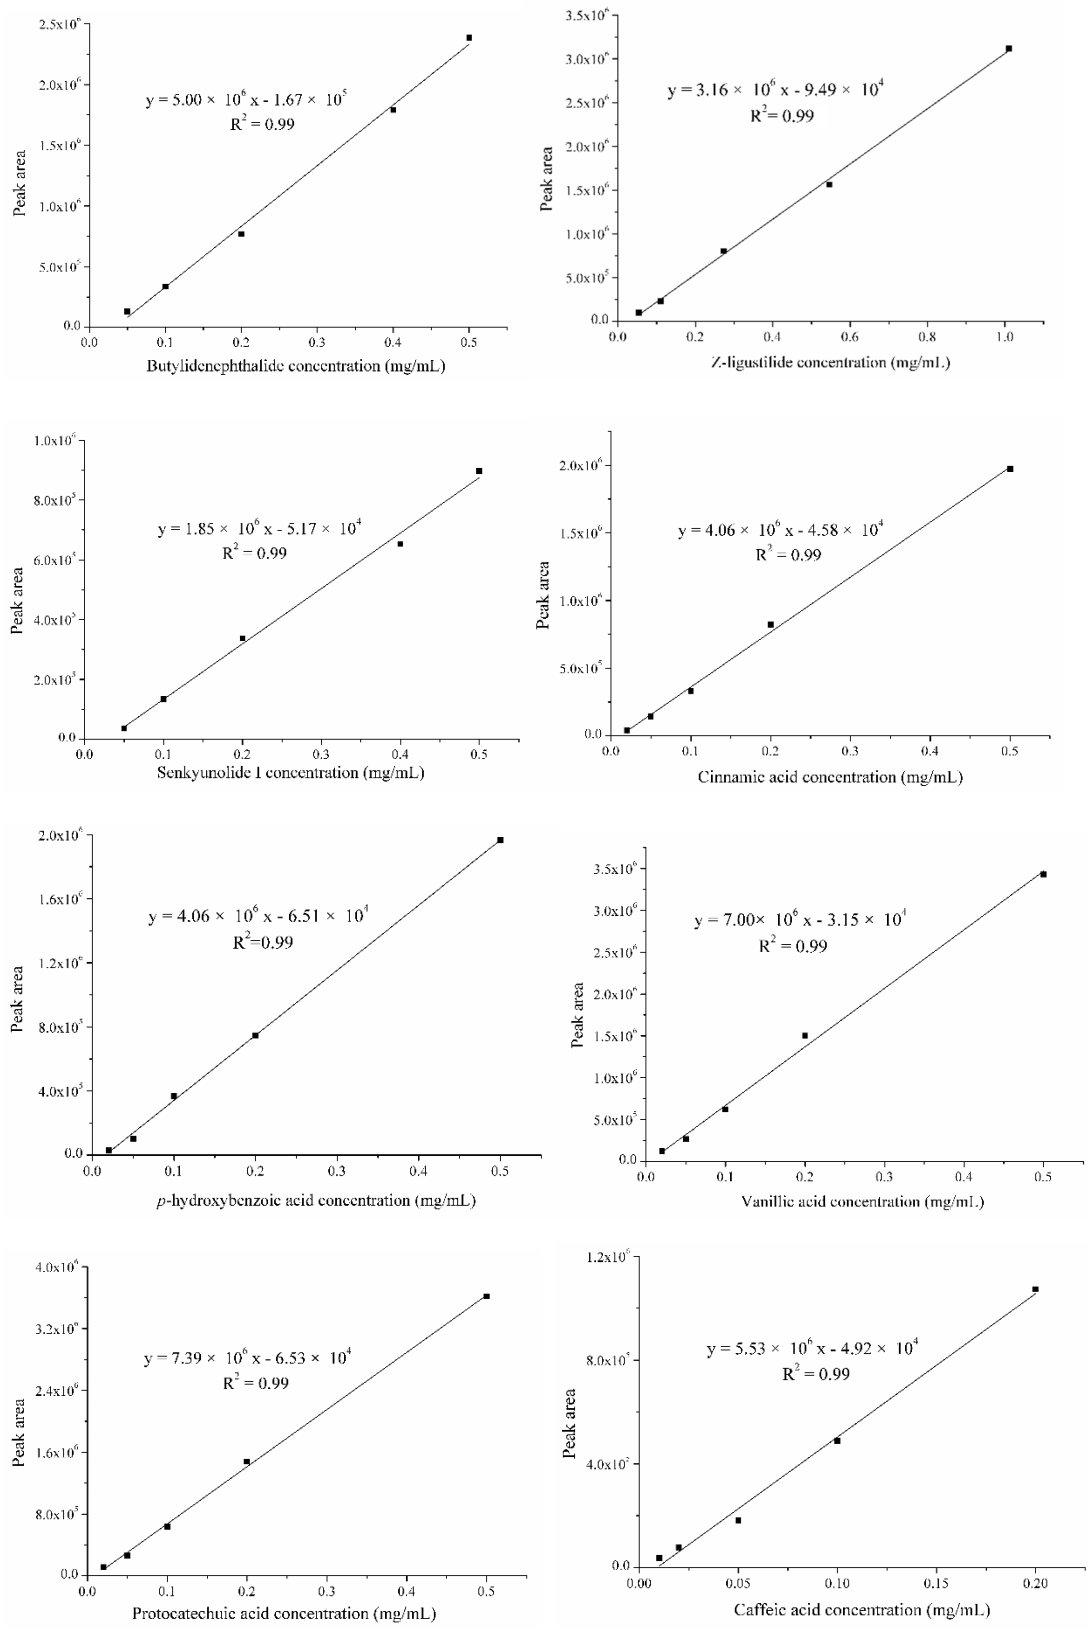

**Figure S2.** Linear regression equations for calculation of bioactive compounds identified in GC chromatograms (continued).

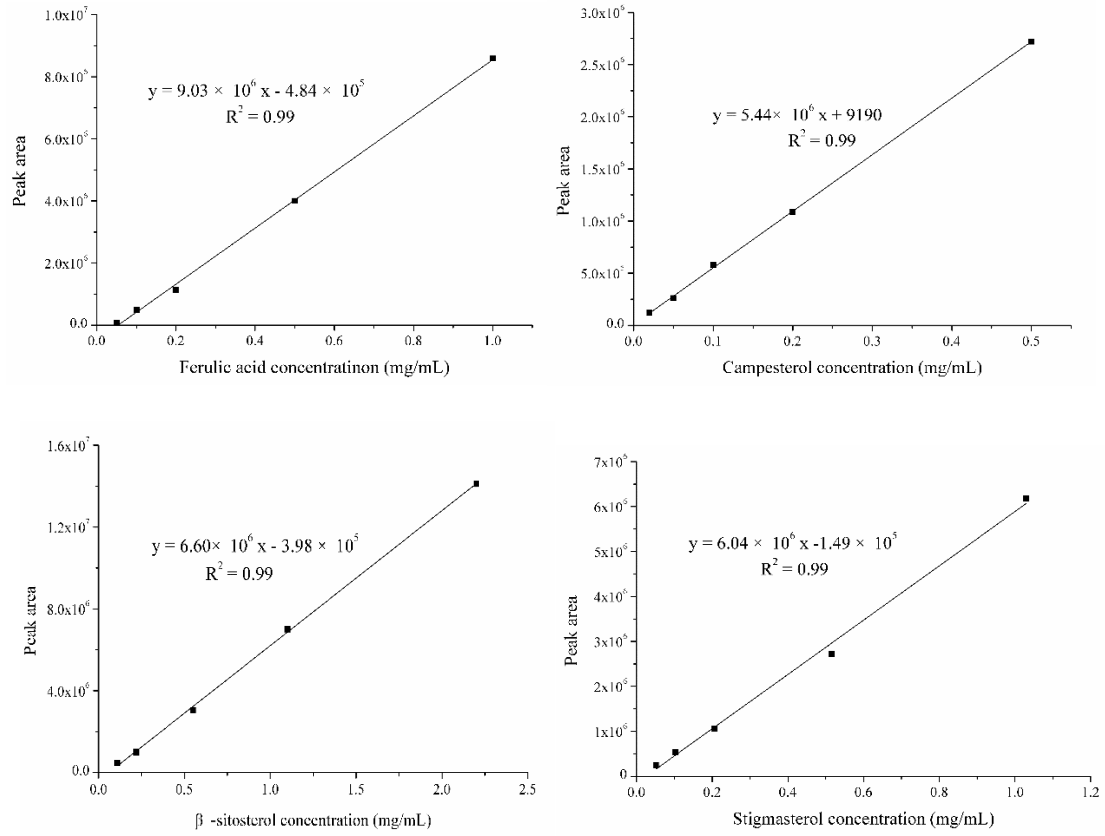

**Figure S2.** Linear regression equations for calculation of bioactive compounds identified in GC chromatograms.

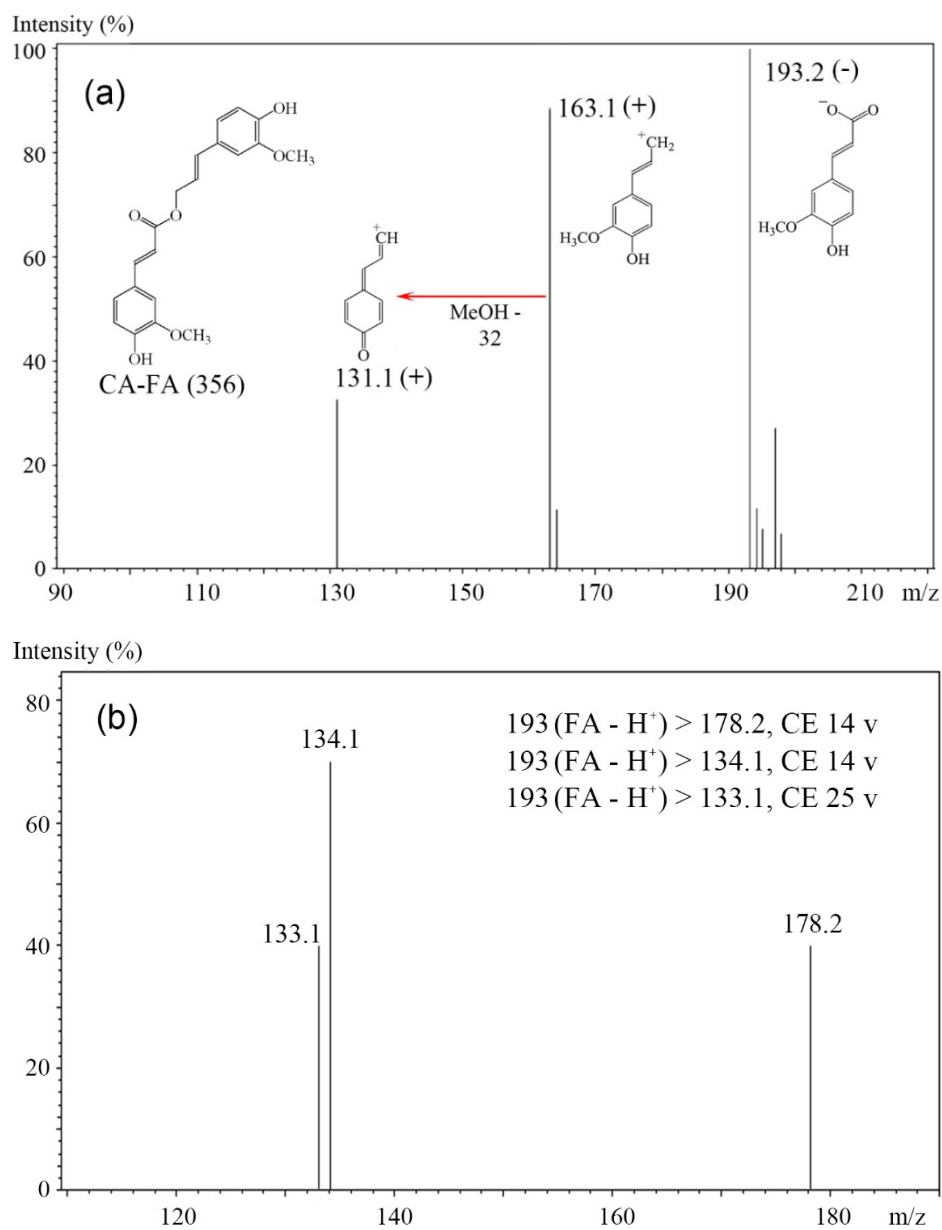

**Figure S3.** MS spectrum of coniferyl ferulate (CA-FA) (a) and the optimized MS fragmentations and corresponding optimal collision energies (CE) for  $[FA-H]^-$  ( $m/z$  193) ion in MRM mode (b).

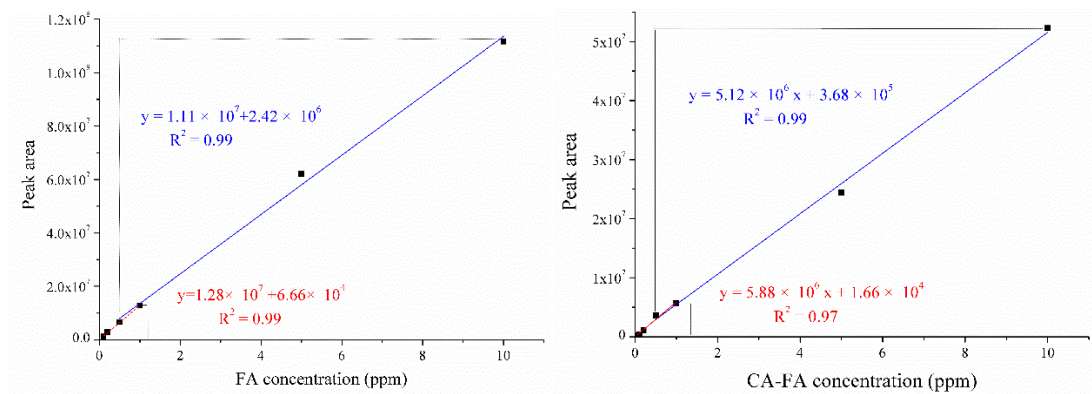

**Figure S4.** Linear regression equations of ferulic acid (FA) and coniferyl ferulate (CA-FA) in LC chromatograms.

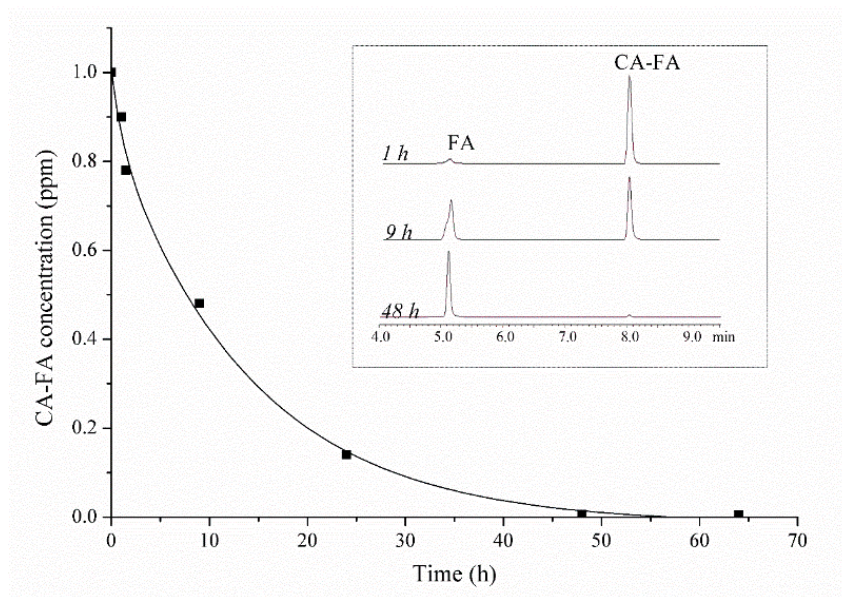

**Figure 5.** Degradation of coniferyl ferulate in methanol solution (temperature 25 °C). FA is ferulic acid, CA-FA is coniferyl ferulate.
